# Supplementary material for: Spatial regulation of coordinated excitatory and inhibitory synaptic plasticity at dendritic synapses
Source: bioRxiv or medRxiv preprint supplement (doi:10.1101/2021.05.31.446423), 2021-05-31
Supplement: Supplementary file [file media-1.pdf]

**TABLE**

| REAGENT or RESOURCE                                    | SOURCE          | IDENTIFIER                      |
|--------------------------------------------------------|-----------------|---------------------------------|
| <b>Antibodies</b>                                      |                 |                                 |
| Anti-vGAT-Oyster 550                                   | Synaptic System | 131103C3,<br>RRID:AB_887867     |
| Rat monoclonal anti-HA                                 | Roche           | 1186742300,<br>RRID:AB_10094468 |
| Qdot® 655 F(ab') <sub>2</sub> -Goat anti-Rat IgG (H+L) | Thermo Fisher   | Q-11621MP,<br>RRID:AB_2556477   |
|                                                        |                 |                                 |
| <b>Bacterial and Virus Strains</b>                     |                 |                                 |
|                                                        |                 |                                 |
|                                                        |                 |                                 |
|                                                        |                 |                                 |
|                                                        |                 |                                 |
| <b>Biological Samples</b>                              |                 |                                 |
|                                                        |                 |                                 |
|                                                        |                 |                                 |
|                                                        |                 |                                 |
|                                                        |                 |                                 |
|                                                        |                 |                                 |
| <b>Chemicals, Peptides, and Recombinant Proteins</b>   |                 |                                 |
| BAPTA                                                  | Sigma           | 85233-19-8                      |
| L-NAME                                                 | Sigma           | N5751                           |
| Nifedipine                                             | Sigma           | N-7634                          |
| Bicuculline                                            | Sigma           | 14343                           |
| MDL28170                                               | Sigma           | M-6690                          |
| KN-93                                                  | Millipore Merck | 422708                          |
| KN-92                                                  | Millipore Merck | 422709                          |
| APV                                                    | Tocris          | 0105/50                         |
| CNQX                                                   | Tocris          | 1045/10                         |
| $\omega$ -conotoxin MVIIC                              | Tocris          | 1084/100U                       |
| $\omega$ -conotoxin GVIA                               | Tocris          | 1085/250U                       |
| DPNI-caged-GABA                                        | Tocris          | 2991/10                         |
| MNI-caged-L-glutamate                                  | Tocris          | 1490/10                         |
| Rhod-2 tripotassium salt                               | AAT Bioquest    | 21067                           |
|                                                        |                 |                                 |
| <b>Critical Commercial Assays</b>                      |                 |                                 |
| Effectene Transfection Reagent                         | Qiagen          | 301427                          |
|                                                        |                 |                                 |
|                                                        |                 |                                 |
|                                                        |                 |                                 |
| <b>Deposited Data</b>                                  |                 |                                 |
|                                                        |                 |                                 |
|                                                        |                 |                                 |
|                                                        |                 |                                 |

|                                                     |                         |                                                                                                                                                                                                             |
|-----------------------------------------------------|-------------------------|-------------------------------------------------------------------------------------------------------------------------------------------------------------------------------------------------------------|
|                                                     |                         |                                                                                                                                                                                                             |
| <b>Experimental Models: Cell Lines</b>              |                         |                                                                                                                                                                                                             |
|                                                     |                         |                                                                                                                                                                                                             |
|                                                     |                         |                                                                                                                                                                                                             |
|                                                     |                         |                                                                                                                                                                                                             |
| <b>Experimental Models: Organisms/Strains</b>       |                         |                                                                                                                                                                                                             |
| Ai9 (B6.Cg-Gt(ROSA)26Sortm9(CAGtdTomato) Hze/J)     | Jackson Laboratory, USA | JAX:007909,<br>RRID:IMSR_JAX:007909                                                                                                                                                                         |
| PVCRE (B6;129P2-Pvalbtm1(cre) Arbr/J)               | Jackson Laboratory, USA | JAX:017320,<br>RRID:IMSR_JAX:017320                                                                                                                                                                         |
| Parvalbumin-tdTomato (PV-tdTomato)                  | This paper              |                                                                                                                                                                                                             |
|                                                     |                         |                                                                                                                                                                                                             |
|                                                     |                         |                                                                                                                                                                                                             |
| <b>Oligonucleotides</b>                             |                         |                                                                                                                                                                                                             |
|                                                     |                         |                                                                                                                                                                                                             |
|                                                     |                         |                                                                                                                                                                                                             |
|                                                     |                         |                                                                                                                                                                                                             |
|                                                     |                         |                                                                                                                                                                                                             |
| <b>Recombinant DNA</b>                              |                         |                                                                                                                                                                                                             |
| pEGFP-N1                                            | Clontech                | Cat# 632162                                                                                                                                                                                                 |
| pcDNA3 Homer1c::DsRed                               | Petrini et al., 2009    | N/A                                                                                                                                                                                                         |
| pcDNA3 Homer1c::GFP                                 | Petrini et al., 2009    | N/A                                                                                                                                                                                                         |
| FingR-Gephyrin-GFP                                  | Gross et al., 2013      | N/A                                                                                                                                                                                                         |
| EGFP-Gephyrin                                       | Zita et al., 2007       | N/A                                                                                                                                                                                                         |
|                                                     |                         |                                                                                                                                                                                                             |
| Hemagglutinin (HA)-tagged $\alpha$ 1 GABAA receptor |                         |                                                                                                                                                                                                             |
| <b>Software and Algorithms</b>                      |                         |                                                                                                                                                                                                             |
| Metamorph 7.8                                       | Molecular Devices       | <a href="http://www.moleculardevices.com/Products/Software/Meta-Imaging-Series/MetaMorph.html">http://www.moleculardevices.com/Products/Software/Meta-Imaging-Series/MetaMorph.html</a><br>RRID: SCR_002368 |
| Clampex 10.6                                        | Molecular Devices       | <a href="http://www.moleculardevices.com/products/software/pclamp.html">http://www.moleculardevices.com/products/software/pclamp.html</a><br>RRID:SCR_011323                                                |
| Clampfit 10.7                                       | Molecular Devices       | <a href="http://www.moleculardevices.com/products/software/pclamp.html">http://www.moleculardevices.com/products/software/pclamp.html</a><br>RRID:SCR_011323                                                |
| MATLAB                                              | Mathworks               | <a href="http://www.mathworks.com/products/matlab/">http://www.mathworks.com/products/matlab/</a><br>RRID:SCR_001622                                                                                        |

|                                                                |                                                            |                                                                                     |
|----------------------------------------------------------------|------------------------------------------------------------|-------------------------------------------------------------------------------------|
| GraphPad Prism 6                                               | GraphPad                                                   | <a href="http://www.graphpad.com/">http://www.graphpad.com/</a><br>RRID: SCR_002798 |
| Custom program written for MATLAB to reconnect QD trajectories | Petrini et al., 2014;<br>from<br>D Choquet and L<br>Cognet | N/A                                                                                 |
| Custom program for SPT quantifications                         | Petrini et al., 2014;<br>from<br>D Choquet and A<br>Serge  | N/A                                                                                 |
| Other                                                          |                                                            |                                                                                     |
|                                                                |                                                            |                                                                                     |
|                                                                |                                                            |                                                                                     |
|                                                                |                                                            |                                                                                     |
|                                                                |                                                            |                                                                                     |
|                                                                |                                                            |                                                                                     |

## SUPPLEMENTARY FIGURES

**Figure S1**

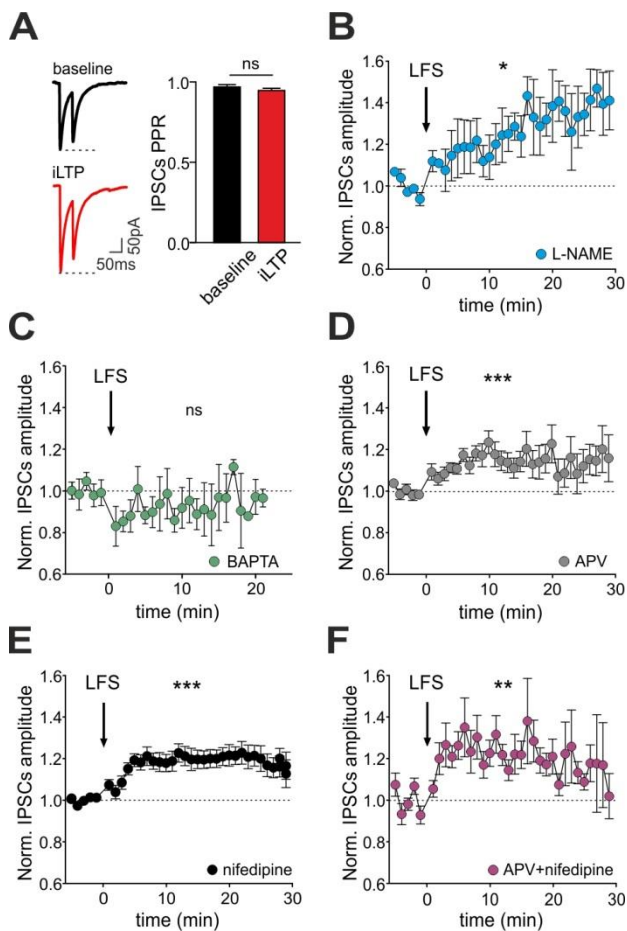

**Figure S1 (related to Figure 1): Postsynaptic mechanism and  $\text{Ca}^{2+}$  dependence of LFS-induced iLTP**

**A-B.** Unlikely presynaptic mechanisms of iLTP. **A.** Left: Representative IPSC paired pulses traces recorded before (baseline) and after (iLTP) the delivery of the LFS. Right: Quantification of the paired pulse ratio (PPR) ( $n = 25$ ;  $p = 0.14$ , paired Student's *t*-test). **B.** The nitric oxide synthase blocker L-NAME does not prevent LFS-induced iLTP ( $n = 5$ ,  $F_{33,136} = 1.6$ ,  $p = 0.03$ ; one-way ANOVA followed by Turkey's multiple comparison test). **C-E.** Time course of relative IPSC amplitude increase before and after the delivery of the LFS protocol (arrow), in the presence of the fast  $\text{Ca}^{2+}$  chelator BAPTA (**C**;  $n = 4$ ,  $F_{25,69} = 0.4$ ,  $p = 0.99$ ), APV (**D**;  $n = 11$ ,  $F_{33,241} = 2.2$ ,  $p < 0.001$ ), nifedipine (**E**;  $n = 21$ ,  $F_{33,640} = 3.6$ ,  $p < 0.001$ ), and APV + nifedipine (**F**;  $n = 6$ ,  $F_{33,162} = 2.1$ ,  $p = 0.002$ ). One-way ANOVA followed by Turkey's multiple comparison test. Values are expressed as mean  $\pm$  SEM. \* $p < 0.05$ , \*\* $p < 0.01$ , \*\*\*\* $p < 0.001$ , ns = not significant.

**Figure S2**

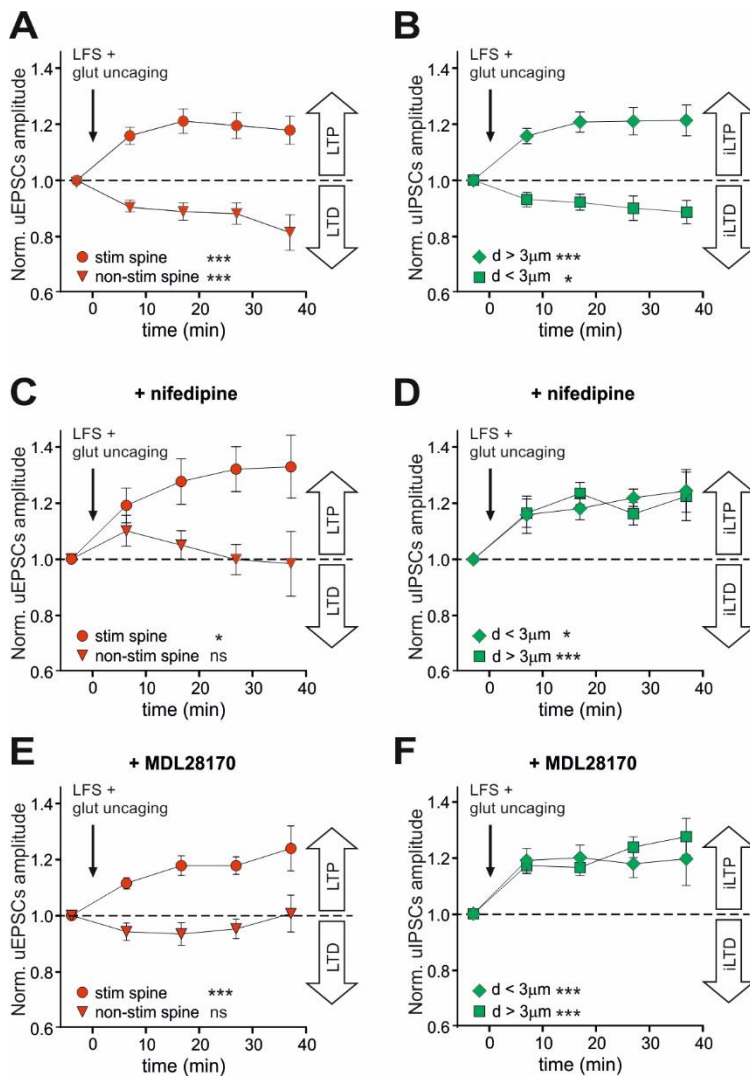

**Figure S2 (related to Figure 4): Spatial coordination of the plasticity of excitatory and inhibitory synapses upon single spine LTP**

**A.** After the “LFS+glut uncaging” protocol, the stimulated spine is selectively potentiated (circle,  $n = 7-20$  synapses from 20 neurons,  $F_{4,61} = 9.3$ ,  $p < 0.001$ ) and the non-photostimulated (“non-stim”) spines (putatively exposed only to LFS) are depressed (triangle,  $n = 6-16$  from 20 neurons,  $F_{4,51} = 6.3$ ,  $p < 0.001$ ). All the statistical comparison shown here are performed with one-way ANOVA followed by Dunnett’s post-test. **B.** After the “LFS+glut uncaging protocol”, GABAergic synapses located at  $d > 3 \mu\text{m}$  from the stimulated spine are potentiated (diamond,  $n = 7-41$  synapses from 20 neurons,  $F_{4,127} = 11.4$ ,  $p < 0.001$ ) and those located at  $d < 3 \mu\text{m}$  are depressed (square,  $n = 11-30$  20 neurons,  $F_{4,103} = 3.0$ ,  $p = 0.02$ ). **C.** Same as in A in presence of nifedipine. Stimulated spine,  $n = 4-7$  synapses from 7 neurons,  $F_{4,26} = 3.9$ ,  $p = 0.01$ ; non-photostimulated spine,  $n = 3-6$  synapses from 7 neurons,  $F_{4,20} = 0.8$ ,  $p = 0.51$ . **D.** Same as in B, in presence of nifedipine.  $d < 3 \mu\text{m}$ ,  $n = 3-9$  synapses from 7 neurons,  $F_{4,27} = 4.0$ ,  $p = 0.01$ ;  $d > 3 \mu\text{m}$ ,  $n = 4-14$  synapses from 7 neurons,  $F_{4,45} = 6.1$ ,  $p < 0.001$ . **E.** Same as in A in presence of MDL28170. Stimulated spine,  $n = 3-24$  synapses from

24 neurons,  $F_{4,78} = 11.9$ ,  $p < 0.001$ ; non-photostimulated spine,  $n = 3-25$  synapses from 24 neurons,  $F_{4,70} = 1.2$ ,  $p = 0.31$ . **F.** Same as in B, in presence of MDL28170.  $d < 3 \mu\text{m}$ ,  $n = 5-24$  synapses from 24 neurons,  $F_{4,71} = 7.1$ ,  $p < 0.001$ ;  $d > 3$ ,  $n = 6-68$  synapses from 24 neurons,  $F_{4,174} = 20.0$ ,  $p < 0.001$ . Values are expressed as mean  $\pm$  SEM. \* $p < 0.05$ , \*\*\* $p < 0.001$ , ns = not significant.

**Figure S3**

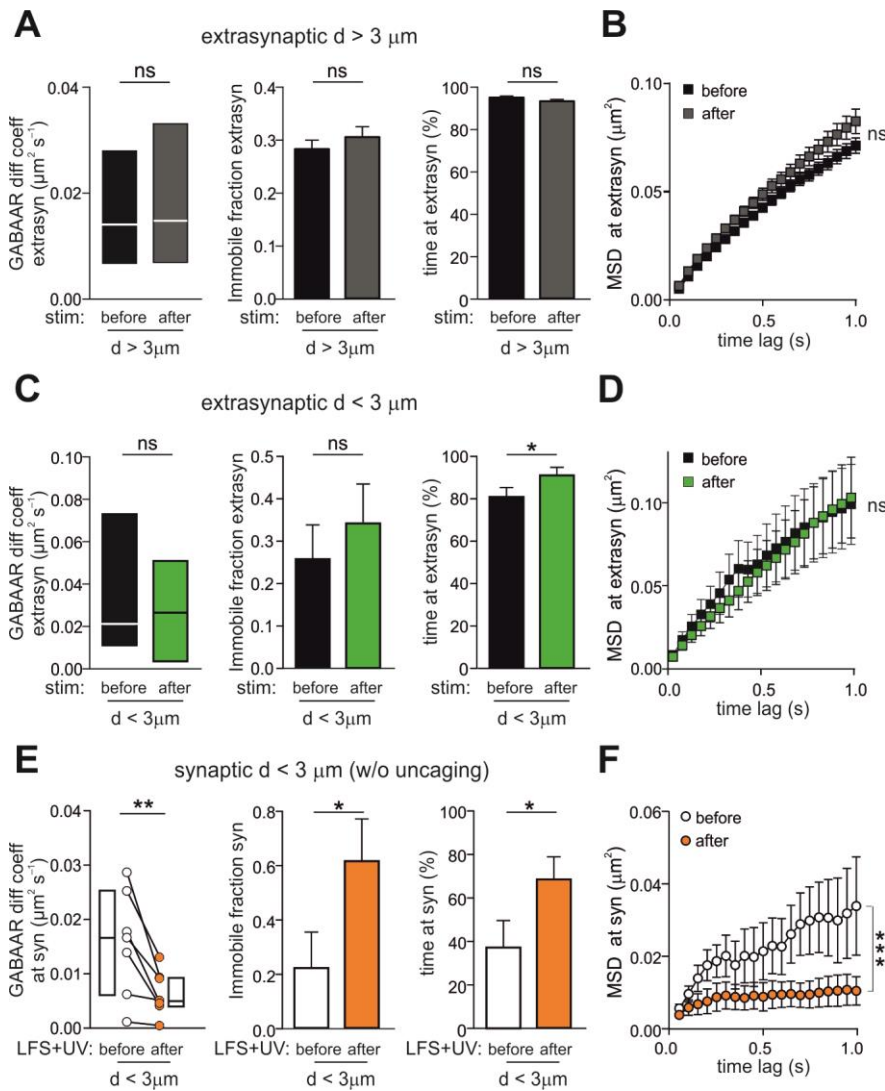

**Figure S3 (related to Figure 7): Supplementary data on the modulation of GABAAR lateral mobility upon single spine LTP**

**A-B.** Characterization of the lateral mobility of extrasynaptic GABAARs located at  $d > 3 \mu\text{m}$  from the potentiated spine, before (black) and after (grey) the single spine LTP protocol. **A.** Left: Median diffusion coefficient and interquartile range (IQR;  $n = 526-620$  trajectories from 22 neurons;  $p = 0.63$ , Mann-Whitney test). Middle: Immobile fraction ( $n = 526-620$  trajectories from 22 neurons;  $p = 0.40$ , Mann-Whitney test). Right: Percentage of time spent by GABAARs in the extrasynaptic compartment ( $n = 526-638$

trajectories;  $p = 0.16$ , Mann-Whitney test). **B.** MSD versus time plot ( $n = 526-617$  from 22 neurons; ns, ordinary two-way ANOVA followed by Bonferroni's post hoc test). **C-D.** Characterization of the lateral mobility of extrasynaptic GABAARs located at  $d < 3 \mu\text{m}$  from the stimulated spine, before (black) and after (green) the single spine LTP protocol. **C.** Left: Paired median diffusion coefficient ( $n = 25$  trajectories from 14 neurons;  $p = 0.34$ , paired Wilcoxon test). Middle: Paired IF ( $n = 25$  trajectories from 14 neurons;  $p = 0.24$ , paired Wilcoxon test). Right: Paired values of percentage time spent by GABAAR receptors in the extrasynaptic compartments at  $d < 3 \mu\text{m}$  from the stimulated spine ( $n = 25$  trajectories from 14 neurons;  $p = 0.01$ , paired Wilcoxon test). **D.** MSD versus time plot of paired extrasynaptic GABAAR receptors close to the potentiated spine ( $d < 3 \mu\text{m}$ ),  $n = 18$  from 14 neurons, ns, RM two-way ANOVA followed by Bonferroni's post hoc test. **E-F.** Same as in C-D, except for the uncaging. Please note that in this set of experiments the stimulating protocol was LFS + 4Hz UV-light pulses train on a spine (ctrl spine) in absence of MNI-glutamate. Only synaptic GABAAR trajectories localized in the range of  $3 \mu\text{m}$  from the ctrl spine were considered. **E.** Left: Paired median diffusion coefficient ( $n = 7$  from 4 neurons;  $p = 0.01$ , paired Wilcoxon test). Middle: Paired IF ( $n = 7$  from 4 neurons;  $p = 0.03$ , paired Wilcoxon test). Right: Paired values of percentage of time spent by GABAAR receptors at synapses close to the control spine ( $n = 7$  from 4 neurons;  $p = 0.01$ , paired Wilcoxon test). **F.** Paired MSD values of synaptic GABAAR receptors close to the control spine ( $d < 3 \mu\text{m}$ ;  $n = 4$  from 4 neurons,  $p < 0.001$ , RM two-way ANOVA). Unless stated otherwise, values are expressed as mean  $\pm$  SEM. \* $p < 0.05$ , \*\* $p < 0.01$ , ns = not significant.
